# Supplementary material for: Mast Cell Tryptase Contributes to Pancreatic Cancer Growth through Promoting Angiogenesis via Activation of Angiopoietin-1
Source: PubMed Central journal article supplement (PMC4926368; doi:10.3390/ijms17060834), 2016-05-27
Supplement: ijms-17-00834-s001.pdf [file ijms-17-00834-s001.pdf]

# Supplementary Materials: Mast Cell Tryptase Contributes to Pancreatic Cancer Growth through Promoting Angiogenesis via Activation of Angiopoietin-1

Xiangjie Guo, Liqin Zhai, Ruobing Xue, Jieru Shi, Qiang Zeng and Cairong Gao

Table S1. Primers used.

| Gene Name     | Forward (5'–3')          | Reverse (5'–3')          |
|---------------|--------------------------|--------------------------|
| <i>ANGPT1</i> | AGCGCCGAAGTCCAGAAAAC     | TACTCTCACGACAGTTGCCAT    |
| <i>ANGPT2</i> | AACTTTCGGAAGAGCATGGAC    | CGAGTCATCGTATTCGAGCGG    |
| <i>TIE2</i>   | CGAGTTCGAGGAGAGGCAATC    | TCAGGTAATTCATGCCGGG      |
| <i>LYVE1</i>  | AATTCACAGAAGCTAAGGAGGC   | TCAAGGCTGTTTCAACTTGGTC   |
| <i>PDGF</i>   | TGATGCCGAGGAACTATTCATCT  | TTTCTTCTCGTGCAGTGTAC     |
| <i>VEGF</i>   | GGCTGGCAACATAACAGAGAA    | TCCTTTCCTTAGCTGACACTTGT  |
| <i>VEGFR</i>  | AAGGCCGTGTCATCATTTCAGAC  | ACCACTTGATTGTAGGTCGAGGGA |
| <i>CD31</i>   | CCAAGGTGGGATCGTGAGG      | TCGGAAGGATAAAAACGCGGTC   |
| <i>FGF2</i>   | ATGGCTCCCTTAGCCGAAGT     | AGGAAATGCGAACCCACCTG     |
| <i>CCL20</i>  | AATCAGAAGCAGCAAGCAACT    | TTTTACTGAGGAGACGCACAA    |
| <i>GAPDH</i>  | CGGAGTCAACGGATTTGGTCGTAT | AGCCTTCTCCATGGTGGTGAAGAC |
